# Supplementary material
Source: PubMed Central journal article supplement (PMC3674053)
Supplement: epi-8-445-s01.pdf [file epi-8-445-s01.pdf]

## **Supplemental Material to:**

**Robert Lowe, Carolina Gemma, Huriya Beyan, Mohammed I. Hawa, Alex Bazeos, R. David Leslie, Alexandre Montpetit, Vardhman K. Rakyan and Sreeram V. Ramagopalan**

**Buccals are likely to be a more informative surrogate tissue than blood for epigenome-wide association studies**

**Epigenetics 2013; 8(4)**

**<http://dx.doi.org/10.4161/epi.24362>**

**[http://www.landesbioscience.com/journals/epigenetics/  
article/24362/](http://www.landesbioscience.com/journals/epigenetics/article/24362/)**

**Table S1: Sample statistics for buccal BS-Seq data****BS-Seq mapping**

All BS-Seq samples were initially QC by FastQC (<http://www.bioinformatics.babraham.ac.uk/projects/fastqc/>) and were then mapped using BiFast (<https://bitbucket.org/xboxrob/bifast>) with parameters  $-n$  1 and  $-l$  50. For blood and buccal data a large percentage of the reverse end of

| Sample ID | sex    | ethnicity | age (years) at buccal cell extraction |
|-----------|--------|-----------|---------------------------------------|
| 1         | Male   | caucasian | 51                                    |
| 2         | Male   | caucasian | 24                                    |
| 3         | Male   | caucasian | 18                                    |
| 4         | Male   | caucasian | 24                                    |
| 5         | Male   | caucasian | 20                                    |
| 6         | Male   | caucasian | 51                                    |
| 7         | Female | caucasian | 40                                    |
| 8         | Male   | caucasian | 11                                    |
| 9         | Male   | caucasian | 72                                    |
| 10        | Female | caucasian | 29                                    |
| 11        | Female | caucasian | 40                                    |
| 12        | Male   | caucasian | 42                                    |
| 13        | Male   | caucasian | 40                                    |
| 14        | Male   | caucasian | 72                                    |

the paired end reads mapped poorly and hence those that did not map were re-mapped using the forward end in single end mode. Paired end reads were filtered for clonality by assigning reads as clonal if the forward and reverse read mapped to exactly the same location. A read from all the clonal reads at each location was taken using random sampling providing it passed a minimum mapping quality of 15. For single end reads, a clonal read was defined by those reads that mapped to the same genomic location. Bisulphite conversion rates were calculated by measuring the conversion of cytosines in a non-CpG context (Buccal 98.1% Blood 99.1%; **Table S2**)

**Table S2: Pooled statistics for blood and buccal BS-Seq data.**

|               | Number of Sequences | Number mapped Paired End | Paired end after filtering | Number Mapped Single End | Single End after filtering | Cove rage | CpG (%) | CHG (%) | CHH (%) |
|---------------|---------------------|--------------------------|----------------------------|--------------------------|----------------------------|-----------|---------|---------|---------|
| <b>Buccal</b> | 6283213773          | 2174291340               | 516667527                  | 1552616328               | 330217907                  | 43        | 71.1    | 0.7     | 1.2     |
| <b>Blood</b>  | 793730071           | 302431954                | 280560367                  | 300859288                | 276523228                  | 36        | 70.9    | 0.5     | 0.4     |

**Table S3: GEO IDs for samples analysed**

| <b>Sample</b> | <b>GEO ID</b> |
|---------------|---------------|
| CD14+ 1       | TBC           |
| CD4+ 1        | TBC           |
| CD14+ 2       | TBC           |
| CD4+ 2        | TBC           |
| CD14+ 3       | TBC           |
| CD4+ 3        | TBC           |
| CD14+ 4       | TBC           |
| CD4+ 4        | TBC           |
| CD14+ 5       | TBC           |
| CD4+ 5        | TBC           |
| CD14+ 6       | TBC           |
| CD4+ 6        | TBC           |
| CD14+ 7       | TBC           |
| CD4+ 7        | TBC           |
| CD14+ 8       | TBC           |
| CD4+ 8        | TBC           |
| CD14+ 9       | TBC           |
| CD4+ 9        | TBC           |
| CD14+ 10      | TBC           |
| CD4+ 10       | TBC           |
| CD14+ 11      | TBC           |
| CD4+ 11       | TBC           |
| CD14+ 12      | TBC           |
| CD4+ 12       | TBC           |
| CD14+ 13      | TBC           |
| CD14+ 14      | TBC           |
| CD14+ 15      | TBC           |
| CD14+ 16      | TBC           |
| CD14+ 17      | TBC           |
| CD14+ 18      | TBC           |
| CD14+ 19      | TBC           |
| CD14+ 20      | TBC           |
| CD14+ 21      | TBC           |
| Buccal 1      | TBC           |
| Buccal 2      | TBC           |
| Buccal 3      | TBC           |
| CD34+ 1       | TBC           |
| CD34- 1       | TBC           |
| CD34+ 2       | TBC           |
| CD34- 2       | TBC           |
| Placenta 1    | TBC           |
| Placenta 2    | TBC           |
| Pancreas 1    | TBC           |
| Pancreas 2    | TBC           |

|         |     |
|---------|-----|
| Sperm 1 | TBC |
| Sperm 2 | TBC |

**Table S4: Table with the TP and 1-FP rate for various different methylation cut-offs and region size cut-off. Highlighted in bold is the maximum harmonic mean found.** tDMRs were called using a Cochran-Mantel-Haenszel test ( $p$ -value $<0.01$ ) but it was necessary to filter these regions for further analysis. Therefore we investigated the effect of varying both region size and methylation difference cut-off on validation rates in sites also contained on 450K array. Here TP rate is defined as the number of regions overlapping probes called as a tDMP on the 450K array divided by the total number of probes called as tDMPs and the FP rate is defined as the number of regions called as tDMRs that overlapped with a 450K probe that were not called as a tDMP divided by the total number of tDMRs that overlapped with the 450K. tDMPs were obtained using dmpFinder in minfi. Supplementary Table 4 shows that a methylation difference cut-off of 30% and a minimum window size of 50bp (highlighted in bold) produced the highest harmonic mean of TP rate and 1-FP rate. Showing that over 80% of tDMPs were found and over 70% of tDMRs called were validated. A 50% methylation difference and 200bp window was chosen for main analysis as this allowed for a very low FP rate and hence our so-called tDMRs have a high validation rate.

| Methylation Difference | Minimum Window Size | TP               | 1-FP               | Harmonic Mean      |
|------------------------|---------------------|------------------|--------------------|--------------------|
| 0                      | 0                   | 0.942621101      | 0.494329042        | 0.648547186        |
| 0                      | 50                  | 0.939009526      | 0.500980353        | 0.653373098        |
| 0                      | 100                 | 0.932463546      | 0.505735189        | 0.655792021        |
| 0                      | 150                 | 0.924156923      | 0.509258818        | 0.656662333        |
| 0                      | 200                 | 0.91449596       | 0.512433022        | 0.656820254        |
| 0                      | 300                 | 0.891111011      | 0.517061645        | 0.654407431        |
| 0.1                    | 0                   | 0.940273577      | 0.498094928        | 0.651217679        |
| 0.1                    | 50                  | 0.936662002      | 0.504363052        | 0.655668969        |
| 0.1                    | 100                 | 0.930116022      | 0.509109294        | 0.65803555         |
| 0.1                    | 150                 | 0.921809399      | 0.512589065        | 0.658825884        |
| 0.1                    | 200                 | 0.912148436      | 0.515750564        | 0.658927655        |
| 0.1                    | 300                 | 0.888808632      | 0.520183074        | 0.65627527         |
| 0.2                    | 0                   | 0.91440567       | 0.563256545        | 0.697107868        |
| 0.2                    | 50                  | 0.910794095      | 0.569612225        | 0.700887917        |
| 0.2                    | 100                 | 0.904473839      | 0.57359916         | 0.702002451        |
| 0.2                    | 150                 | 0.896573518      | 0.575888944        | 0.701310614        |
| 0.2                    | 200                 | 0.887318857      | 0.578030621        | 0.70003433         |
| 0.2                    | 300                 | 0.865423683      | 0.58096206         | 0.695220245        |
| 0.3                    | 0                   | 0.81003115       | 0.687086669        | 0.743510761        |
| 0.3                    | 50                  | <b>0.8070516</b> | <b>0.694379071</b> | <b>0.746487668</b> |

|            |     |             |             |             |
|------------|-----|-------------|-------------|-------------|
| <b>0.3</b> | 100 | 0.801724527 | 0.697438968 | 0.745954566 |
| <b>0.3</b> | 150 | 0.794997968 | 0.698921837 | 0.743870505 |
| <b>0.3</b> | 200 | 0.78750395  | 0.700689098 | 0.74156432  |
| <b>0.3</b> | 300 | 0.768904338 | 0.703134134 | 0.73454994  |
| <b>0.4</b> | 0   | 0.605932012 | 0.790323875 | 0.685952396 |
| <b>0.4</b> | 50  | 0.603855356 | 0.797827448 | 0.687419973 |
| <b>0.4</b> | 100 | 0.600695228 | 0.800722739 | 0.686433797 |
| <b>0.4</b> | 150 | 0.595729312 | 0.801179232 | 0.683346029 |
| <b>0.4</b> | 200 | 0.590176516 | 0.802595416 | 0.680187409 |
| <b>0.4</b> | 300 | 0.578393752 | 0.803920997 | 0.672759778 |
| <b>0.5</b> | 0   | 0.302469414 | 0.860283026 | 0.447574727 |
| <b>0.5</b> | 50  | 0.301115074 | 0.868922086 | 0.447243125 |
| <b>0.5</b> | 100 | 0.299354431 | 0.872144764 | 0.445720152 |
| <b>0.5</b> | 150 | 0.296781184 | 0.872635845 | 0.442924795 |
| <b>0.5</b> | 200 | 0.293259898 | 0.873772364 | 0.439135065 |
| <b>0.5</b> | 300 | 0.286849352 | 0.874882703 | 0.43204375  |
| <b>0.6</b> | 0   | 0.058958963 | 0.875216638 | 0.11047573  |
| <b>0.6</b> | 50  | 0.058146359 | 0.898912058 | 0.109227321 |
| <b>0.6</b> | 100 | 0.05728861  | 0.908201305 | 0.10777863  |
| <b>0.6</b> | 150 | 0.055889125 | 0.908656145 | 0.105301427 |
| <b>0.6</b> | 200 | 0.054805652 | 0.91182266  | 0.10339659  |
| <b>0.6</b> | 300 | 0.052683852 | 0.915376677 | 0.099633376 |
| <b>0.7</b> | 0   | 0.00433389  | 0.711627907 | 0.008615312 |
| <b>0.7</b> | 50  | 0.004017877 | 0.832335329 | 0.00799715  |
| <b>0.7</b> | 100 | 0.00365672  | 0.857142857 | 0.007282372 |
| <b>0.7</b> | 150 | 0.003340707 | 0.854961832 | 0.006655408 |
| <b>0.7</b> | 200 | 0.003024694 | 0.881355932 | 0.006028699 |
| <b>0.7</b> | 300 | 0.002663537 | 0.911764706 | 0.005311557 |
| <b>0.8</b> | 0   | 0.000316013 | 0.319148936 | 0.0006314   |
| <b>0.8</b> | 50  | 0.000225723 | 0.555555556 | 0.000451264 |
| <b>0.8</b> | 100 | 0.000180579 | 0.642857143 | 0.000361056 |
| <b>0.8</b> | 150 | 0.000180579 | 0.666666667 | 0.00036106  |
| <b>0.8</b> | 200 | 0.000180579 | 0.727272727 | 0.000361068 |
| <b>0.8</b> | 300 | 0.000180579 | 1           | 0.000361092 |
| <b>0.9</b> | 0   | 0           | 0.208333333 | 0           |
| <b>0.9</b> | 50  | 0           | 0.5         | 0           |
| <b>0.9</b> | 100 | 0           | 1           | 0           |
| <b>0.9</b> | 150 | 0           | 1           | 0           |
| <b>0.9</b> | 200 | 0           | 1           | 0           |
| <b>0.9</b> | 300 | 0           | 1           | 0           |
| <b>1</b>   | 0   | 0           | 0.090909091 | 0           |

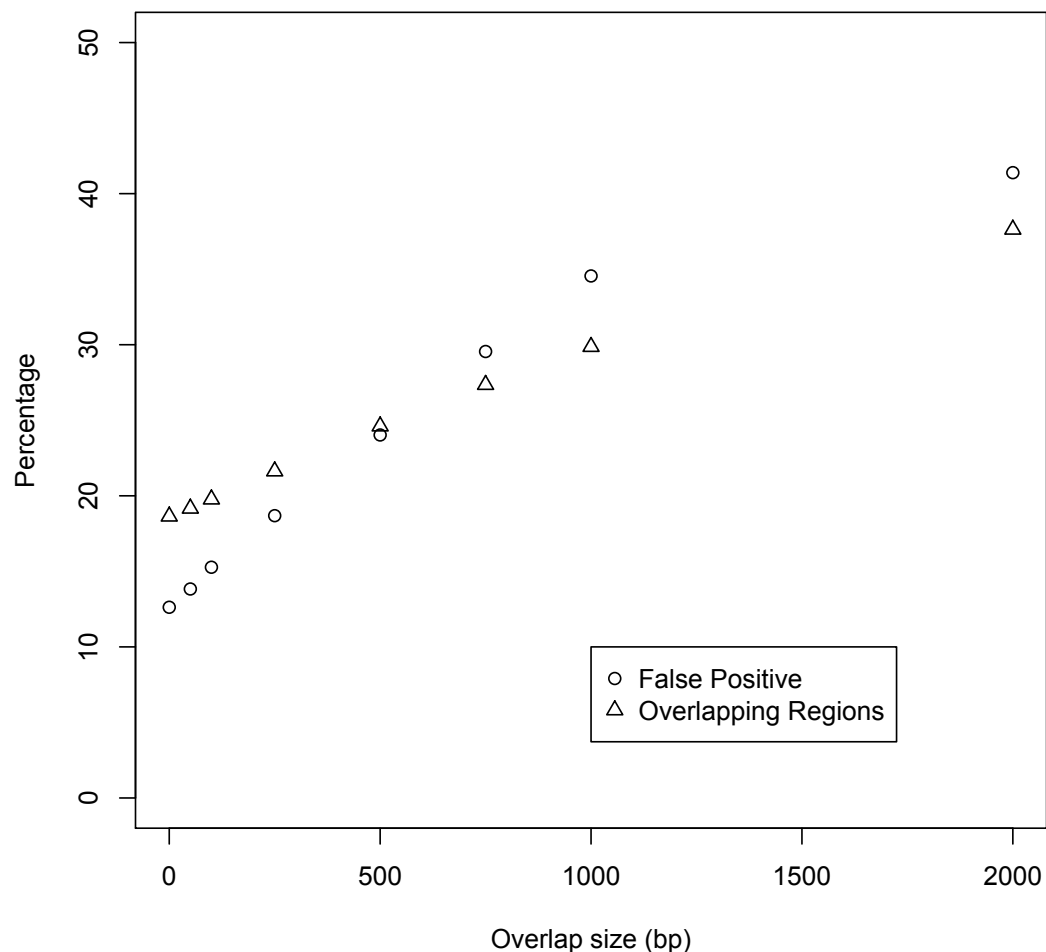

**Figure S1:** Analysis of varying the allowed overlap between BS-Seq tDMRs and 450K or RRBS-Seq data. As we increase the overlap the validation rate falls suggesting we are not capturing the true methylation state.

**Location of External data used for paper excluding the >1000 450K samples that can be downloaded using Marmal-aid with the script supplied**

| Data Name     | Location                                                                                                                                                      |
|---------------|---------------------------------------------------------------------------------------------------------------------------------------------------------------|
| UCSC Genes    | <a href="http://hgdownload.soe.ucsc.edu/goldenPath/hg19/database/knowGene.txt.gz">http://hgdownload.soe.ucsc.edu/goldenPath/hg19/database/knowGene.txt.gz</a> |
| RegFeats      | <a href="http://ftp.ensembl.org/RegulatoryFeatures_MultiCell.gff.gz">http://ftp.ensembl.org/RegulatoryFeatures_MultiCell.gff.gz</a>                           |
| H3K27me3 PBMC | <a href="http://www.ncbi.nlm.nih.gov/geo/query/acc.cgi?acc=GSM613877">http://www.ncbi.nlm.nih.gov/geo/query/acc.cgi?acc=GSM613877</a>                         |
| H3K9me3 PBMC  | <a href="http://www.ncbi.nlm.nih.gov/geo/query/acc.cgi?acc=GSM613878">http://www.ncbi.nlm.nih.gov/geo/query/acc.cgi?acc=GSM613878</a>                         |
| H3K9ac PBMC   | <a href="http://www.ncbi.nlm.nih.gov/geo/query/acc.cgi?acc=GSM613879">http://www.ncbi.nlm.nih.gov/geo/query/acc.cgi?acc=GSM613879</a>                         |

|                                                  |                                                                                                                                                                                                                                                                                                                                                                                                                                                                                                            |
|--------------------------------------------------|------------------------------------------------------------------------------------------------------------------------------------------------------------------------------------------------------------------------------------------------------------------------------------------------------------------------------------------------------------------------------------------------------------------------------------------------------------------------------------------------------------|
| <b>H3K36me3 PBMC</b>                             | <a href="http://www.ncbi.nlm.nih.gov/geo/query/acc.cgi?acc=GSM613880">http://www.ncbi.nlm.nih.gov/geo/query/acc.cgi?acc=GSM613880</a>                                                                                                                                                                                                                                                                                                                                                                      |
| <b>H3K4me1 PBMC</b>                              | <a href="http://www.ncbi.nlm.nih.gov/geo/query/acc.cgi?acc=GSM613884">http://www.ncbi.nlm.nih.gov/geo/query/acc.cgi?acc=GSM613884</a>                                                                                                                                                                                                                                                                                                                                                                      |
| <b>miRNA</b>                                     | <a href="http://hgdownload.soe.ucsc.edu/goldenPath/hg19/database/wgRNA.txt.gz">http://hgdownload.soe.ucsc.edu/goldenPath/hg19/database/wgRNA.txt.gz</a>                                                                                                                                                                                                                                                                                                                                                    |
| <b>Long non-coding RNA</b>                       | <a href="ftp://ftp.sanger.ac.uk/pub/genencode/release_13/genencode.v13.long_noncoding_RNAs.gtf.gz">ftp://ftp.sanger.ac.uk/pub/genencode/release_13/genencode.v13.long_noncoding_RNAs.gtf.gz</a>                                                                                                                                                                                                                                                                                                            |
| <b>mRNA</b>                                      | <a href="http://hgdownload.soe.ucsc.edu/goldenPath/hg19/database/all_mrna.txt.gz">http://hgdownload.soe.ucsc.edu/goldenPath/hg19/database/all_mrna.txt.gz</a>                                                                                                                                                                                                                                                                                                                                              |
| <b>Dnase Clustered Transcription Factor Chip</b> | <a href="http://hgdownload.cse.ucsc.edu/goldenpath/hg19/encodeDCC/wgEncodeRegDnaseClustered/wgEncodeRegDnaseClustered.bed.gz">http://hgdownload.cse.ucsc.edu/goldenpath/hg19/encodeDCC/wgEncodeRegDnaseClustered/wgEncodeRegDnaseClustered.bed.gz</a><br><a href="http://hgdownload.cse.ucsc.edu/goldenPath/hg19/encodeDCC/wgEncodeRegTfbsClustered/wgEncodeRegTfbsClustered.bed.gz">http://hgdownload.cse.ucsc.edu/goldenPath/hg19/encodeDCC/wgEncodeRegTfbsClustered/wgEncodeRegTfbsClustered.bed.gz</a> |
| <b>CpG Islands</b>                               | <a href="http://hgdownload.soe.ucsc.edu/goldenPath/hg19/database/cpgIslandExt.txt.gz">http://hgdownload.soe.ucsc.edu/goldenPath/hg19/database/cpgIslandExt.txt.gz</a>                                                                                                                                                                                                                                                                                                                                      |
| <b>H3K27ac ES</b>                                | <a href="http://www.ncbi.nlm.nih.gov/geo/query/acc.cgi?acc=GSM605307">http://www.ncbi.nlm.nih.gov/geo/query/acc.cgi?acc=GSM605307</a>                                                                                                                                                                                                                                                                                                                                                                      |
| <b>H3K36me3 ES</b>                               | <a href="http://www.ncbi.nlm.nih.gov/geo/query/acc.cgi?acc=GSM605310">http://www.ncbi.nlm.nih.gov/geo/query/acc.cgi?acc=GSM605310</a>                                                                                                                                                                                                                                                                                                                                                                      |
| <b>H3K27me3 ES</b>                               | <a href="http://www.ncbi.nlm.nih.gov/geo/query/acc.cgi?acc=GSM667622">http://www.ncbi.nlm.nih.gov/geo/query/acc.cgi?acc=GSM667622</a>                                                                                                                                                                                                                                                                                                                                                                      |
| <b>H3K4me1 ES</b>                                | <a href="http://www.ncbi.nlm.nih.gov/geo/query/acc.cgi?acc=GSM667626">http://www.ncbi.nlm.nih.gov/geo/query/acc.cgi?acc=GSM667626</a>                                                                                                                                                                                                                                                                                                                                                                      |
| <b>H3K4me2 ES</b>                                | <a href="http://www.ncbi.nlm.nih.gov/geo/query/acc.cgi?acc=GSM605314">http://www.ncbi.nlm.nih.gov/geo/query/acc.cgi?acc=GSM605314</a>                                                                                                                                                                                                                                                                                                                                                                      |
| <b>H3K4me3 ES</b>                                | <a href="http://www.ncbi.nlm.nih.gov/geo/query/acc.cgi?acc=GSM605316">http://www.ncbi.nlm.nih.gov/geo/query/acc.cgi?acc=GSM605316</a>                                                                                                                                                                                                                                                                                                                                                                      |
| <b>H2AZ ES</b>                                   | <a href="http://www.ncbi.nlm.nih.gov/geo/query/acc.cgi?acc=GSM807391">http://www.ncbi.nlm.nih.gov/geo/query/acc.cgi?acc=GSM807391</a>                                                                                                                                                                                                                                                                                                                                                                      |
| <b>Ctcf ES</b>                                   | <a href="http://hgdownload.cse.ucsc.edu/goldenpath/hg19/encodeDCC/wgEncodeOpenChromChip/wgEncodeOpenChromChipH1hesCtcfRawDataRep1.fastq.gz">http://hgdownload.cse.ucsc.edu/goldenpath/hg19/encodeDCC/wgEncodeOpenChromChip/wgEncodeOpenChromChipH1hesCtcfRawDataRep1.fastq.gz</a>                                                                                                                                                                                                                          |
| <b>Pol2 ES</b>                                   | <a href="http://hgdownload.cse.ucsc.edu/goldenpath/hg19/encodeDCC/wgEncodeOpenChromChip/wgEncodeOpenChromChipH1hesPol2RawDataRep1.fastq.gz">http://hgdownload.cse.ucsc.edu/goldenpath/hg19/encodeDCC/wgEncodeOpenChromChip/wgEncodeOpenChromChipH1hesPol2RawDataRep1.fastq.gz</a>                                                                                                                                                                                                                          |
| <b>RRBS-Seq Skeletal Muscle</b>                  | <a href="http://hgdownload.cse.ucsc.edu/goldenPath/hg19/encodeDCC/wgEncodeHaibMethylRrbs/wgEncodeHaibMethylRrbsBcskeletalMuscle0111002BiochainSitesRep1.bed.gz">http://hgdownload.cse.ucsc.edu/goldenPath/hg19/encodeDCC/wgEncodeHaibMethylRrbs/wgEncodeHaibMethylRrbsBcskeletalMuscle0111002BiochainSitesRep1.bed.gz</a>                                                                                                                                                                                  |
| <b>RRBS-Seq Islets</b>                           | <a href="http://hgdownload.cse.ucsc.edu/goldenPath/hg19/encodeDCC/wgEncodeHaibMethylRrbs/wgEncodeHaibMethylRrbsPanisletsSitesRep1.bed.gz">http://hgdownload.cse.ucsc.edu/goldenPath/hg19/encodeDCC/wgEncodeHaibMethylRrbs/wgEncodeHaibMethylRrbsPanisletsSitesRep1.bed.gz</a>                                                                                                                                                                                                                              |
| <b>RRBS-Seq Brain</b>                            | <a href="http://hgdownload.cse.ucsc.edu/goldenPath/hg19/encodeDCC/wgEncodeHaibMethylRrbs/wgEncodeHaibMethylRrbsBcbrainh11058nBiochainSitesRep1.bed.gz">http://hgdownload.cse.ucsc.edu/goldenPath/hg19/encodeDCC/wgEncodeHaibMethylRrbs/wgEncodeHaibMethylRrbsBcbrainh11058nBiochainSitesRep1.bed.gz</a>                                                                                                                                                                                                    |
| <b>RRBS-Seq Kidney</b>                           | <a href="http://hgdownload.cse.ucsc.edu/goldenPath/hg19/encodeDCC/wgEncodeHaibMethylRrbs/wgEncodeHaibMethylRrbsBckidney0111">http://hgdownload.cse.ucsc.edu/goldenPath/hg19/encodeDCC/wgEncodeHaibMethylRrbs/wgEncodeHaibMethylRrbsBckidney0111</a>                                                                                                                                                                                                                                                        |

---

|                           |                                                                                                                                                                                                                                                                                                         |
|---------------------------|---------------------------------------------------------------------------------------------------------------------------------------------------------------------------------------------------------------------------------------------------------------------------------------------------------|
|                           | 002BiochainSitesRep1.bed.gz                                                                                                                                                                                                                                                                             |
| <b>RRBS-Seq<br/>Liver</b> | <a href="http://hgdownload.cse.ucsc.edu/goldenPath/hg19/encodeDCC/wgEncodeHaibMethylRrbs/wgEncodeHaibMethylRrbsBcliver0111002BiochainSitesRep1.bed.gz">http://hgdownload.cse.ucsc.edu/goldenPath/hg19/encodeDCC/wgEncodeHaibMethylRrbs/wgEncodeHaibMethylRrbsBcliver0111002BiochainSitesRep1.bed.gz</a> |
| <b>DNaseI</b>             | <a href="http://www.ncbi.nlm.nih.gov/geo/query/acc.cgi?acc=GSE26328">http://www.ncbi.nlm.nih.gov/geo/query/acc.cgi?acc=GSE26328</a>                                                                                                                                                                     |

---
